# Supplementary material
Source: publisher figshare collection journal article supplement (https://acs.figshare.com/ndownloader/files/3622692)
Supplement: Supplementary file 1 [file 3622692]

# **Influence of CO<sub>2</sub> Exposure on High-Pressure Methane and CO<sub>2</sub> Adsorption on Various Rank Coals: Implications for CO<sub>2</sub> Sequestration in Coal Seams**

Qianqian Wang,<sup>†</sup> Dengfeng Zhang,<sup>\*†</sup> Haohao Wang,<sup>†</sup> Wenping Jiang,<sup>‡</sup> Xiuping Wu,<sup>‡</sup> Jin Yang,<sup>†</sup> and Peili Huo<sup>†</sup>

<sup>†</sup>Faculty of Chemical Engineering, Kunming University of Science and Technology, Kunming 650500, People's Republic of China

<sup>‡</sup>Xi'an Research Institute of China Coal Technology & Engineering Group Corp., Xi'an 710077, People's Republic of China

\*To whom correspondence should be addressed. Tel.: +86(871)65920242. Email: plum0627@163.com.

## **Supporting Information Contents:**

Supplemental Figures S1-S4

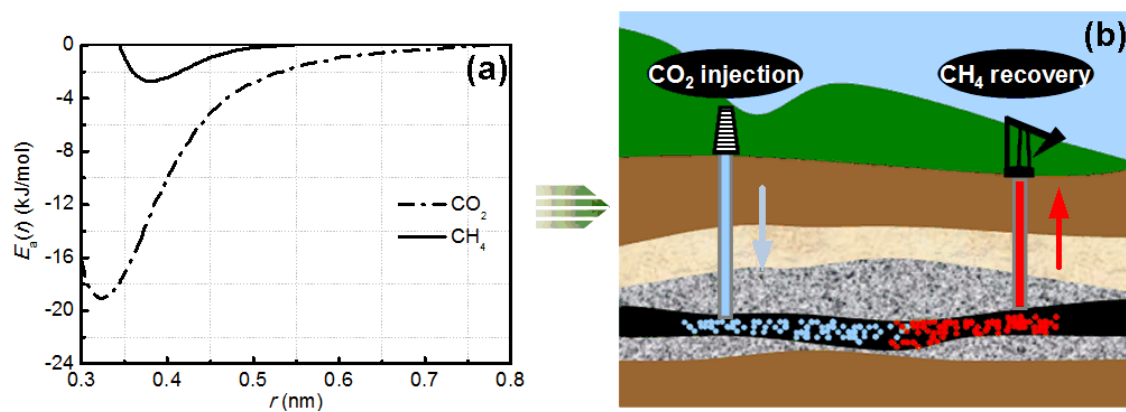

Figure S1. (a) Adsorption potential well of methane and  $\text{CO}_2$ ; (b) Schematic diagram of  $\text{CO}_2$ -ECBM.

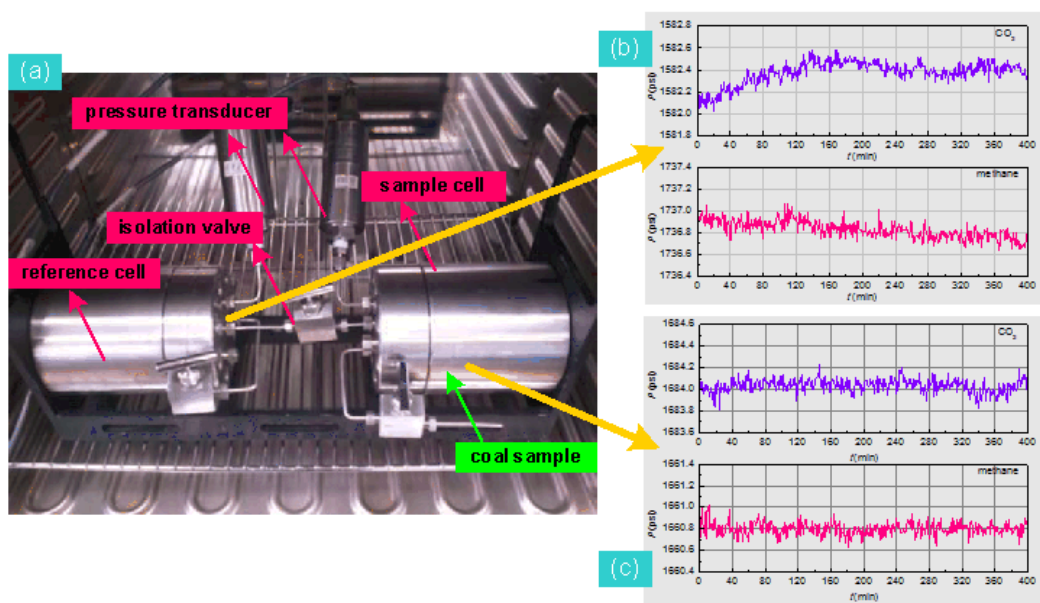

Figure S2. Schematic diagram of volumetric method for measuring methane and  $\text{CO}_2$  equilibrium adsorption capacity.

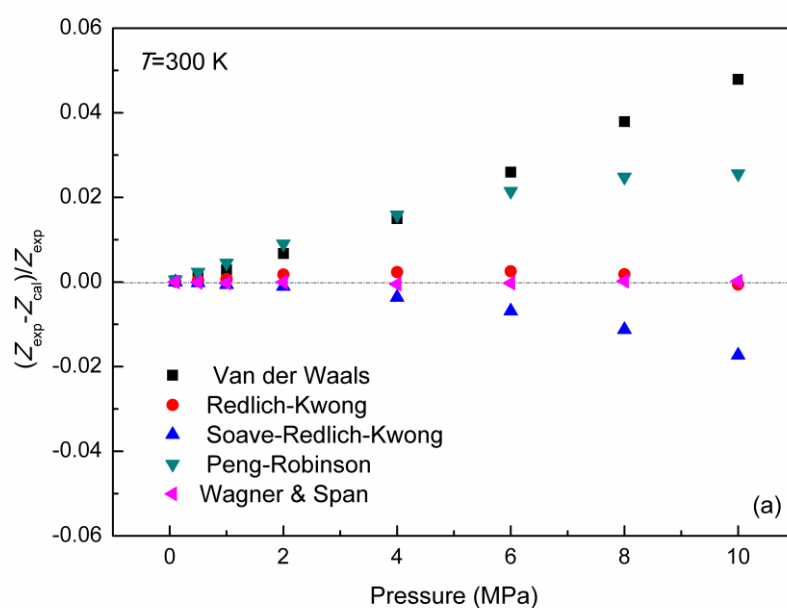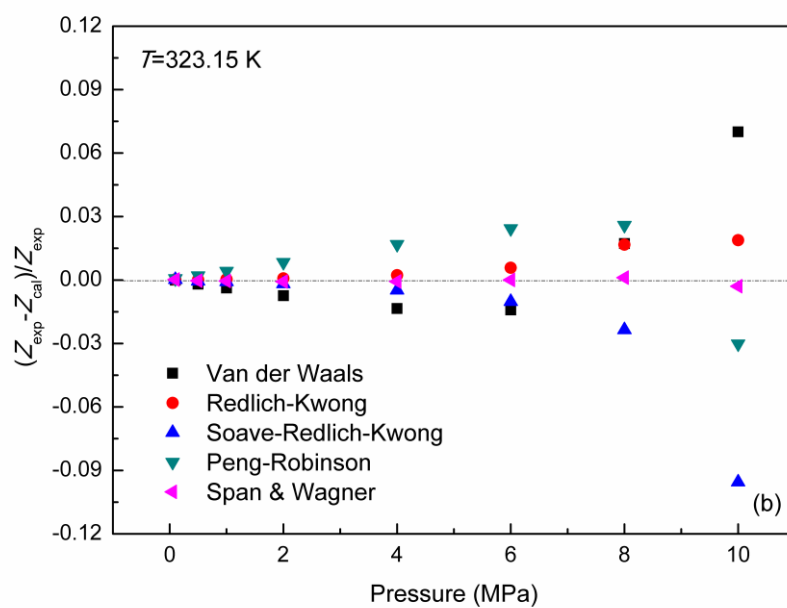

Figure S3. (a) Relative deviation of the compressibility factor of methane calculated by various equations of state; (b) Relative deviation of the compressibility factor of  $\text{CO}_2$  calculated by various equations of state.

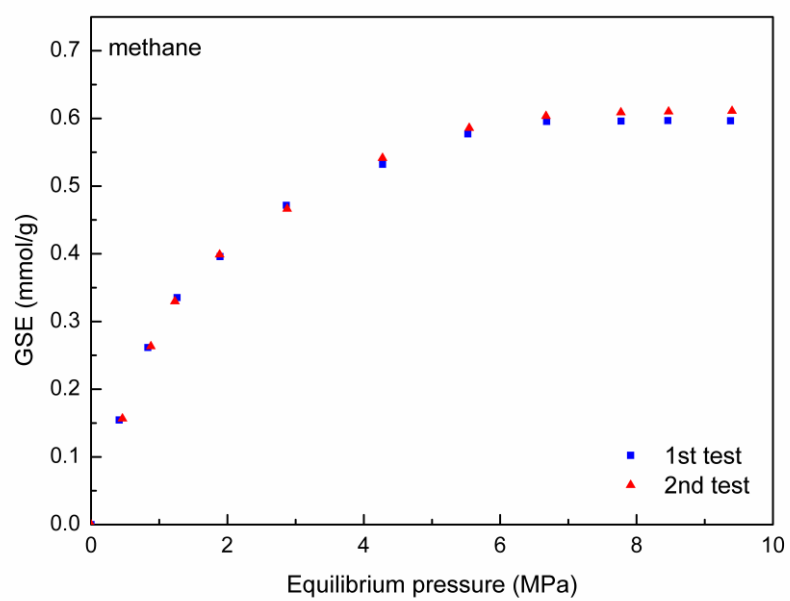

Figure S4. Reproducibility test of high-pressure adsorption isotherm of HB coal sample,  $T=45^{\circ}\text{C}$ .
